# Supplementary material for: Use of an ETEC Proteome Microarray to Evaluate Cross-Reactivity of ETVAX® Vaccine-Induced IgG Antibodies in Zambian Children
Source: MDPI journal article supplement (doi:10.3390/vaccines11050939), 2023-05-04
Supplement: s1 [file s1]

**Table S5:** Plasma antibody responses after 2, 3, and 2 or 3 doses ( $\geq 4$ -fold and  $\geq 2$ -fold and  $\geq 2$  or 4-fold) in cohort B children 10–23 months given 1/8 and 1/4 dose of ETVAX + dmLT or placebo (OEVI24).

| Group                                    | C2FA/I      |    |      | CS3         |    |      | CS5        |    |      | CS6         |   |      | LTB IgA     |    |       | LTB IgG     |    |      |
|------------------------------------------|-------------|----|------|-------------|----|------|------------|----|------|-------------|---|------|-------------|----|-------|-------------|----|------|
|                                          | 2           | 3  | 2or3 | 2           | 3  | 2or3 | 2          | 3  | 2or3 | 2           | 3 | 2or3 | 2           | 3  | 2 or3 | 2           | 3  | 2or3 |
| V 1/8 dose n=20<br>$\geq 4$ -fold resp.  | 1           | 4  | 5    | 4           | 6  | 8    | 1          | 4  | 5    | 1           | 2 | 3    | 12          | 13 | 15    | 15          | 13 |      |
| $\geq 2$ fold resp.                      | 6           | 7  | 9    | 5           | 3  | 5    | 3          | 0  | 3    | 3           | 3 | 5    | 6           | 2  | 4     | 3           | 5  |      |
| V1/4 dose n=19<br>$\geq 4$ -fold resp.   | 4           | 8  | 9    | 2           | 4  | 4    | 3          | 6  | 6    | 0           | 0 | 0    | 8           | 10 | 11    | 6           | 8  |      |
| $\geq 2$ -fold resp.                     | 2           | 1  | 2    | 4           | 2  | 5    | 2          | 1  | 2    | 1           | 2 | 2    | 5           | 3  | 3     | 6           | 5  |      |
| Total no of V<br>responders (%)          | 13          | 20 | 25   | 15          | 15 | 22   | 10         | 10 | 16   | 5           | 6 |      | 31          | 28 | 33    | 31          | 29 |      |
|                                          | 25/39 (64%) |    |      | 22/39 (56%) |    |      | 16/39(41%) |    |      | 10/39 (26%) |   |      | 33/39 (85%) |    |       | 32/37(86%)  |    |      |
| Placebos n=19<br>PI $\geq 4$ -fold resp. | 0           | 2  |      | 1           | 1  |      | 2          | 3  |      | 2           | 3 |      | 4           | 8  |       | 4           | 8  |      |
| PI $\geq 2$ -fold resp.                  | 6           | 6  |      | 4           | 2  |      | 0          | 3  |      | 1           | 2 |      | 1           | 4  |       | 1           | 3  |      |
| Total no of P<br>responders (%)          | 13/20 (65%) |    |      | 7/20 (35%)  |    |      | 8/20 (42%) |    |      | 6/20 (30%)  |   |      | 12/20 (60%) |    |       | 12/19 (63%) |    |      |

**V vs P all responders**

**ns**

**ns**

**ns**

**ns**

**p=0.052**

**p=0.08**
