# Supplementary material for: Use of an ETEC Proteome Microarray to Evaluate Cross-Reactivity of ETVAX® Vaccine-Induced IgG Antibodies in Zambian Children
Source: MDPI journal article supplement (doi:10.3390/vaccines11050939), 2023-05-04
Supplement: s1 [file s1]

**Table S1.** General characteristics of study participants.

|           |                       | Age<br>(months) | Gender | ETEC results<br>(colony PCR) |          | Sick Visit                                       |          |
|-----------|-----------------------|-----------------|--------|------------------------------|----------|--------------------------------------------------|----------|
| ID        | vaccine<br>allocation |                 |        | Visit 1                      | Visit 7  | clinical diagnosis                               | severity |
| S060-2002 | 1/8 dose              | 18              | Female | Negative                     | Negative |                                                  |          |
| S064-2004 | 1/4 dose              | 13              | Male   | Negative                     | Negative |                                                  |          |
| S058-2007 | 1/8 dose              | 15              | Male   | Negative                     | Positive | Acute diarrhoeal disease<br>with no dehydration  | mild     |
| S078-2010 | Placebo               | 20              | Male   | Negative                     | Negative | acute gastroenteritis<br>(with no dehydration)   | moderate |
| S070-2013 | Placebo               | 23              | Female | Negative                     | Positive |                                                  |          |
| S085-2016 | 1/4 dose              | 18              | Male   | Negative                     | Positive |                                                  |          |
| S087-2019 | Placebo               | 22              | Female | Positive                     | Negative |                                                  |          |
| S094-2022 | 1/4 dose              | 14              | Male   | Negative                     | Negative |                                                  |          |
| S095-2025 | 1/8 dose              | 19              | Female | Negative                     | Negative |                                                  |          |
| S104-2028 | 1/4 dose              | 21              | Female | Negative                     | Positive |                                                  |          |
| S103-2031 | 1/8 dose              | 14              | Female | Negative                     | Negative | Acute Gastroenteritis                            | moderate |
| S114-2034 | 1/4 dose              | 23              | Female | Negative                     | Negative |                                                  |          |
| S107-2037 | 1/8 dose              | 21              | Female | Negative                     | Positive | acute gastroenteritis with<br>no dehydration     | moderate |
| S125-2040 | 1/4 dose              | 17              | Female | Negative                     | Positive |                                                  |          |
| S129-2043 | Placebo               | 23              | Female | Negative                     | Negative |                                                  |          |
| S131-2046 | 1/4 dose              | 18              | Female | Negative                     | Negative | Acute gastroenteritis with<br>severe dehydration | severe   |
| S147-2049 | 1/8 dose              | 21              | Female | Negative                     | Negative |                                                  |          |
| S145-2052 | 1/4 dose              | 20              | Female | Positive                     | Negative |                                                  |          |
| S148-2055 | 1/8 dose              | 17              | Female | Negative                     | Negative | acute gastroenteritis with<br>no dehydration     | moderate |
| S142-2057 | 1/8 dose              | 16              | Male   | Positive                     | Positive | acute gastroenteritis with<br>no dehydration     | moderate |
