# Supplementary material for: Use of an ETEC Proteome Microarray to Evaluate Cross-Reactivity of ETVAX® Vaccine-Induced IgG Antibodies in Zambian Children
Source: MDPI journal article supplement (doi:10.3390/vaccines11050939), 2023-05-04
Supplement: s1 [file s1]

**Table S4:** Delta changes in group averages for the top 10 antigens in all vaccinated individuals compared to the placebo group at visit 1 and visit 7.

| Antigen              | Species | Description          | Placebo Average (N=4) | All.Vaccinated Average (N=16) | Average Difference | T-Test P-Value | AUC  | Wilcox P-Value |
|----------------------|---------|----------------------|-----------------------|-------------------------------|--------------------|----------------|------|----------------|
| CS6 lot BB-063B 0.1  | ETEC    | CS6 lot BB-063B 0.1  | -0.362                | 2.085                         | 2.45               | 1.9e-02        | 0.73 | 1.8e-01        |
| CFA/I lot BB-143 0.1 | ETEC    | CFA/I lot BB-143 0.1 | -0.099                | 2.147                         | 2.25               | 9.8e-03        | 0.83 | 5.0e-02        |
| CFA/I 0.1            | ETEC    | CFA/I 0.1            | -0.033                | 1.806                         | 1.84               | 7.8e-03        | 0.81 | 6.4e-02        |
| CS6 0.1              | ETEC    | CS6 0.1              | -0.252                | 1.579                         | 1.83               | 3.5e-02        | 0.67 | 3.4e-01        |
| dsc16GCstH[His]6 0.1 | ETEC    | dsc16GCstH[His]6 0.1 | -0.080                | 1.308                         | 1.39               | 9.7e-02        | 0.80 | 8.0e-02        |
| CfaEad[His]6 0.1     | ETEC    | CfaEad[His]6 0.1     | -1.119                | 0.189                         | 1.31               | 6.3e-02        | 0.86 | 2.9e-02        |
| dsc16BCssB 0.1       | ETEC    | dsc16BCssB 0.1       | 0.001                 | 1.259                         | 1.26               | 7.7e-02        | 0.64 | 4.4e-01        |
| CS19 0.1             | ETEC    | CS19 0.1             | 1.323                 | 0.073                         | -1.25              | 2.1e-01        | 0.25 | 1.5e-01        |
| dsc16GCstG[His]6 0.1 | ETEC    | dsc16GCstG[His]6 0.1 | 0.204                 | 1.443                         | 1.24               | 3.6e-02        | 0.70 | 2.5e-01        |
| CS17 0.1             | ETEC    | CS17 0.1             | 1.048                 | -0.042                        | -1.09              | 3.6e-01        | 0.33 | 3.4e-01        |
