# Supplementary material for: Use of an ETEC Proteome Microarray to Evaluate Cross-Reactivity of ETVAX® Vaccine-Induced IgG Antibodies in Zambian Children
Source: MDPI journal article supplement (doi:10.3390/vaccines11050939), 2023-05-04
Supplement: s1 [file s1]

**Table S2:** Description of purified proteins included in the microarray.

| Array ID                 | Full-length protein name | Description                                      |
|--------------------------|--------------------------|--------------------------------------------------|
| C-EtpA 0.1               | EtpA                     | C-EtpA                                           |
| CFA/I 0.1                | CFA/I                    | CFA/I: Native fimbriae [WS1933D]                 |
| CFA/I lot BB-143 0.1     | CFA/I                    | CFA/I: (lot BB 143) Native fimbriae [WS1933D]    |
| CfaEad[His]6 0.1         | CFA/I                    | p CFA/I: CfaE adhesin domain truncate [E7473/0]3 |
| CotDad[His]6 0.1         | CS2                      | p CS2: CotD adhesin domain truncate [C91f]       |
| CS1 0.1                  | CS1                      | CS1: native fimbriae [3775a-1(pRA101)]           |
| CS14 0.1                 | CS14                     | CS14: native fimbriae [WS3294A(pRA101)]          |
| CS17 0.1                 | CS17                     | CS17: native fimbriae [LSN03-016011/A]           |
| CS19 0.1                 | CS19                     | CS19: native fimbriae [WS0115A(pRA101)]          |
| CS2 0.1                  | CS2                      | CS2: native fimbriae [C91f]                      |
| CS3 0.1                  | CS3                      | CS3: native fimbriae [E9034A]                    |
| CS3 lot BB-107B 0.1      | CS3                      | CS3: native fimbriae [E9034A]                    |
| CS4 0.1                  | CS4                      | CS4: native fimbriae [WS2589A]4                  |
| CS6 0.1                  | CS6                      | CS6: recomb. fimbriae [E8775]                    |
| CS6 lot BB-063B 0.1      | CS6                      | CS6: recomb. fimbriae [E8775]                    |
| CsbDad[His]6 0.1         | CS17                     | p CS17: CsbD adhesin domain truncate [WS6788A]   |
| dsc15CotD[His]6(GGG) 0.1 | CS2                      | p CS2: minor subunit (adhesin) [C91f]            |
| dsc15CsfD[His]6 0.1      | CS4                      | p CS4: minor subunit (adhesin) [WS2560B]         |
| dsc16ACssA 0.1           | CS6                      | p CS6: major subunit [E8775]                     |
| dsc16BCssB 0.1           | CS6                      | p CS6: major subunit [E8775]                     |
| dsc16GCstG[His]6 0.1     | CS3                      | p CS3: major subunit (pilin) [M424C1]            |
| dsc16GCstH[His]6 0.1     | CS3                      | p CS3: major subunit (pilin) [M424C1]            |
| dsc19CfaB[His]6 0.1      | CFA/I                    | p CFA/I: major subunit (pilin) [E7473/0]         |
| dsc19CfaE[His]6 0.1      | CFA/I                    | p CFA/I: minor subunit (adhesin) [E7473/0]       |
| dsc19CsbD[His]6(GGG) 0.1 | CS17                     | p CS17: minor subunit (adhesin) [LSN02-013966/A] |
| dsc19CsuD[His]6 0.1      | CS14                     | p CS14: minor subunit (adhesin) [WS3294A]        |
| dscCooA 0.1              | CS1                      | p CS1: major subunit (pilin) [E24377A]           |
| dscCooD[His]6 0.1        | CS1                      | p CS1: minor subunit (adhesin) [E24377A]         |
| dsCotA 0.1               | CS2                      | p CS2: major subunit (pilin) [C91f]              |
| EaeH 0.1                 | EaeH                     | EaeH                                             |
| EatA 0.1                 | EatA                     | EatA                                             |
| EtpA 0.0001              | EtpA                     | EtpA 0.0001                                      |
| FimHLD 0.1               | FimHLD                   | FimHLD                                           |
| LT-A 0.1                 | LT-A                     | LT-A                                             |
| LT-B 0.1                 | LT-B                     | LT-B                                             |
| N-EtpA 0.1               | EtpA                     | p N-EtpA                                         |
| PCFO71 0.1               | PCFO71                   | PCFO71: native fimbriae [WS2173A]                |
| YghJ 0.1                 | YghJ                     | YghJ                                             |
