# Supplementary material for: Use of an ETEC Proteome Microarray to Evaluate Cross-Reactivity of ETVAX® Vaccine-Induced IgG Antibodies in Zambian Children
Source: MDPI journal article supplement (doi:10.3390/vaccines11050939), 2023-05-04
Supplement: s1 [file s1]

## ETVAX Phase 1 Study flow chart

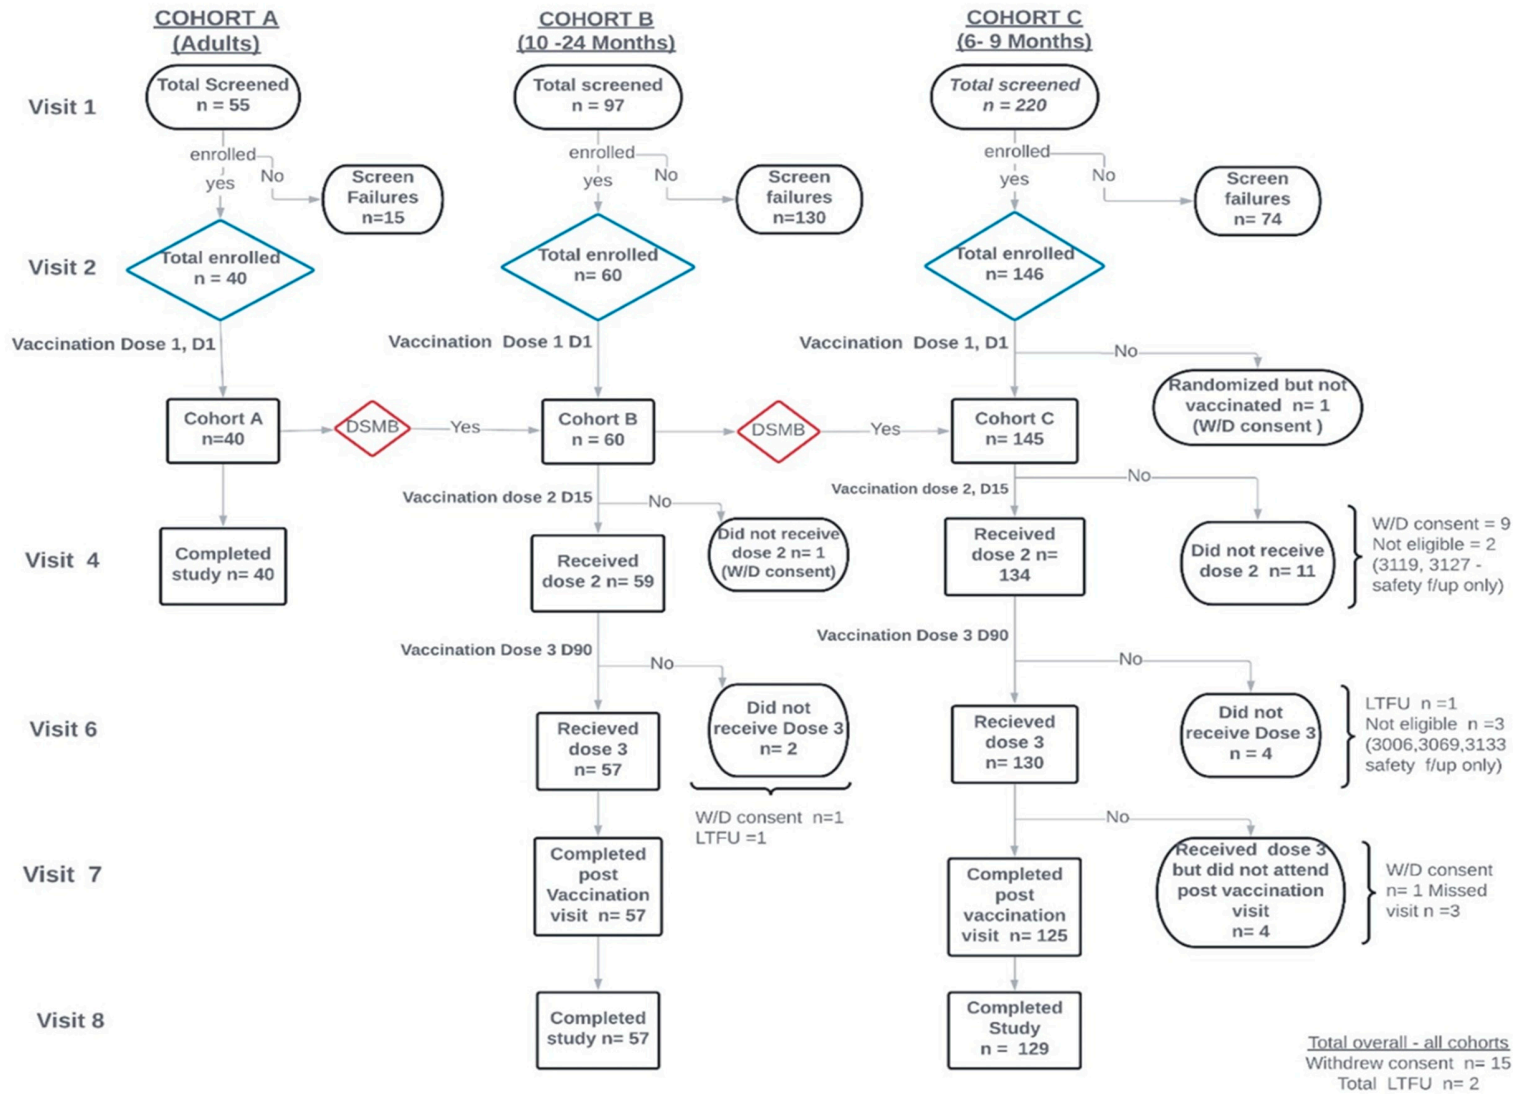

**Figure S1.** The figure shows the clinical trial flowchart showing the distribution of trial participants and their allocation to the different treatment groups.
