# Supplementary material for: Use of an ETEC Proteome Microarray to Evaluate Cross-Reactivity of ETVAX® Vaccine-Induced IgG Antibodies in Zambian Children
Source: MDPI journal article supplement (doi:10.3390/vaccines11050939), 2023-05-04
Supplement: s1 [file s1]

**Table S3:** Group averages for the top 10 antigens ranked by absolute mean difference in the all-vaccinated group.

| Antigen                 | Species | Description             | V1<br>Average<br>(N=16) | V7<br>Average<br>(N=16) | Average<br>Difference | T-Test<br>P-<br>Value | AUC  | Wilcox<br>P-Value | Increase 50<br>Pct Count | Increase 50<br>Pct Frequency |
|-------------------------|---------|-------------------------|-------------------------|-------------------------|-----------------------|-----------------------|------|-------------------|--------------------------|------------------------------|
| CFA/I lot BB-143<br>0.1 | ETEC    | CFA/I lot BB-143<br>0.1 | 11.65                   | 13.79                   | 2.15                  | 1.1e-<br>02           | 0.68 | 9.4e-02           | 10                       | 0.62                         |
| CS6 lot BB-063B<br>0.1  | ETEC    | CS6 lot BB-063B<br>0.1  | 10.10                   | 12.19                   | 2.08                  | 1.4e-<br>02           | 0.70 | 5.6e-02           | 7                        | 0.44                         |
| CS4 0.1                 | ETEC    | CS4 0.1                 | 9.27                    | 11.08                   | 1.82                  | 4.3e-<br>02           | 0.66 | 1.4e-01           | 10                       | 0.62                         |
| CFA/I 0.1               | ETEC    | CFA/I 0.1               | 9.57                    | 11.37                   | 1.81                  | 6.1e-<br>03           | 0.75 | 1.4e-02           | 10                       | 0.62                         |
| CS6 0.1                 | ETEC    | CS6 0.1                 | 9.94                    | 11.52                   | 1.58                  | 6.2e-<br>02           | 0.62 | 2.4e-01           | 6                        | 0.38                         |
| dsc16GCstG[His]6<br>0.1 | ETEC    | dsc16GCstG[His]6<br>0.1 | 8.34                    | 9.78                    | 1.44                  | 1.2e-<br>02           | 0.71 | 4.8e-02           | 10                       | 0.62                         |
| LT-B 0.1                | ETEC    | LT-B 0.1                | 11.17                   | 12.49                   | 1.32                  | 4.4e-<br>05           | 0.83 | 1.1e-03           | 14                       | 0.88                         |
| dsc16GCstH[His]6<br>0.1 | ETEC    | dsc16GCstH[His]6<br>0.1 | 10.33                   | 11.64                   | 1.31                  | 6.5e-<br>03           | 0.69 | 6.1e-02           | 8                        | 0.50                         |
| PCFO71 0.1              | ETEC    | PCFO71 0.1              | 9.41                    | 10.71                   | 1.30                  | 3.9e-<br>04           | 0.77 | 8.8e-03           | 12                       | 0.75                         |
| CS14 0.1                | ETEC    | CS14 0.1                | 9.73                    | 11.00                   | 1.27                  | 2.8e-<br>02           | 0.68 | 9.4e-02           | 6                        | 0.38                         |
