# Supplementary material for: Use of an ETEC Proteome Microarray to Evaluate Cross-Reactivity of ETVAX® Vaccine-Induced IgG Antibodies in Zambian Children
Source: Vaccines (Basel). 2023 May 4;11(5):939. doi: 10.3390/vaccines11050939 (PMC10224314; doi:10.3390/vaccines11050939)
Supplement: Supplementary file 1 [file vaccines-11-00939-s001.zip]

Archive with 6 entries (6 files):
- Etvax cross reactivity_MDPI_Supplementary Figure 1.pdf
- Etvax cross reactivity_MDPI_Supplementary table 1.pdf
- Etvax cross reactivity_MDPI_Supplementary table 2.pdf
- Etvax cross reactivity_MDPI_Supplementary table 3.pdf
- Etvax cross reactivity_MDPI_Supplementary table 4.pdf
- Etvax cross reactivity_MDPI_Supplementary table 5.pdf
